# Supplementary material for: Hormonally Induced Hepatocellular Carcinoma in Diabetic Wild Type and Carbohydrate Responsive Element Binding Protein Knockout Mice
Source: MDPI journal article supplement (doi:10.3390/cells10102787), 2021-10-18
Supplement: s1 [file s1]

## Script written for computer assisted PAS quantification.

The following script was written in Fiji (ImageJ) for the computer assisted PAS quantification.

```
macro "H&PAS color deconvolution" {
input = getDirectory("Input directory");
output = getDirectory("Output directory");
Dialog.create("File type");
Dialog.addString("File suffix: ", ".jpg", 5);
Dialog.show();
suffix = Dialog.getString();
processFolder(input);
function processFolder(input) {
list = getFileList(input);
for (i = 0; i < list.length; i++) {
if(File.isDirectory(list[i]))
processFolder(input + list[i]);
if(endsWith(list[i], suffix))
processFile(input, output, list[i]);
}
}
function processFile(input, output, file) {
print("Processing: " + input + file);
open(input + file);
title = getTitle();
directory = File.directory();
write("processing: "+title+" @" + directory);
run("Colour Deconvolution", "vectors=[H PAS] hide");
selectWindow(title+"-(Colour_3)");
close();
selectWindow(title+"-(Colour_2)");
run("Measure");
saveAs("TIFF", output+title+"-colour_2");
//setThreshold(0, 150);
setThreshold(0, 150);
setOption("BlackBackground", false);
run("Convert to Mask");
run("Measure");
saveAs("JPEG", output+title+"-colour_2_mask");
close();
selectWindow(title+"-(Colour_1)");
run("Measure");
saveAs("TIFF", output+title+"-colour_1");
close();
selectWindow(title);
run("8-bit");
//setThreshold(0, 200);
setThreshold(0, 200);
setOption("BlackBackground", false);
run("Convert to Mask");
run("Measure");
saveAs("JPEG", output+title+"_mask");
close();
}
}
```
